# Supplementary material
Source: PubMed Central journal article supplement (PMC4178649)
Supplement: AEM.01036-14_zam999105711so1.pdf [file AEM.01036-14_zam999105711so1.pdf]

## 1    **Supplementary material**

2

3    Figure S1: *Vibrio harveyi* quantification done by qPCR in European abalone tissues and  
4    hemolymph.

5    Standard densities or concentrations (bacteria number per 100 mg of tissue or mL of  
6    hemolymph) were estimated by optical density, plating and microscopic enumeration. Cycle  
7    thresholds ( $C_t$ ) were provided by the qPCR supplied software, and the average of three  
8    separated assays was visualized on the graphs for each separate tissue. The mathematical  
9    equation and the  $R^2$  index of simple regression between  $C_t$  and standard concentrations were  
10   indicated for each tissue.

11   A: density estimation in gills; B: in digestive gland; C: in foot-muscle; D: concentration  
12   estimation in hemolymph.

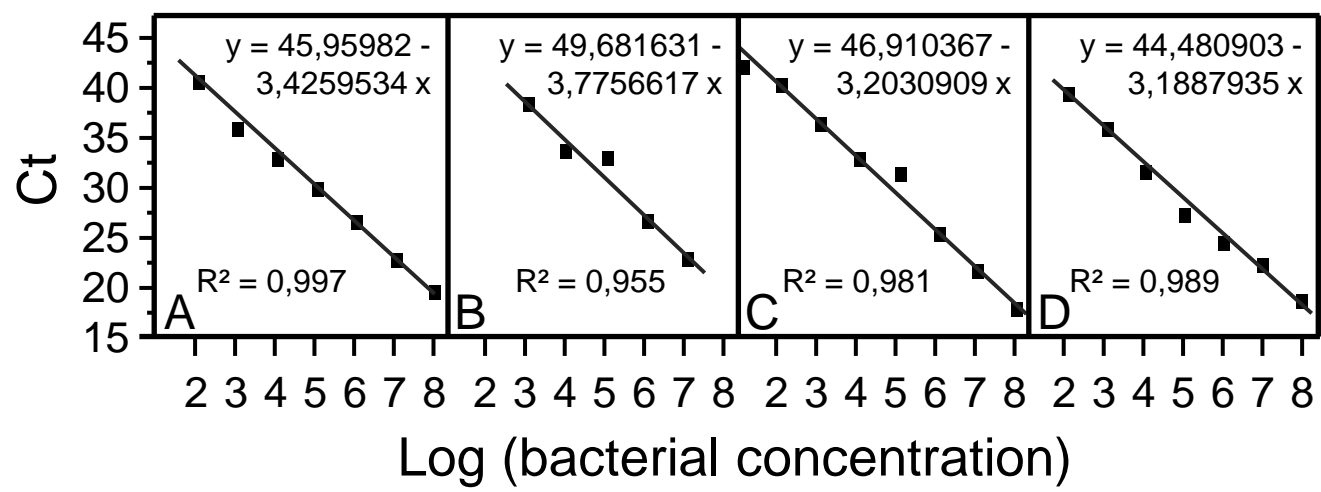

Fig. S1
